# Supplementary material
Source: Research Square preprint supplement (doi:10.21203/rs.3.rs-10069087/v1)
Supplement: Supplementary file 1 [file a94eb3ece4302b2618aa3964.pdf]

## Supplementary Dataset

The Supplementary dataset files includes the results of the phylogenetic and geotemporal analysis conducted using WNV Nextstrain [1] workflow (<https://github.com/nextstrain/wnv>), available through the INSaFLU-TELEVIR platform v.2.2.2 (<https://insaflu.insa.pt>; <https://github.com/INSAFLU/WNV>, as of 2026-02-12) [2,3].

The analysis included a total of 3,126 international WNV lineage 1A genome sequences (>10,000 bp) publicly available, obtained from the Nextstrain build (as of 2026-02-05), and confirmed to correspond to the same non-redundant sequences available at Pathoplexus (<https://pathoplexus.org/>, accessed on 2026-02-05). To further refine the phylogenetic and geotemporal analysis, the Nextstrain subtree in which the 2025 Portuguese sequences clustered was zoomed in, including a subset of 34 sequences (eight from Portugal, 24 from Spain, and two from Senegal). For this focused analysis, higher-resolution geographic metadata were used when available, namely NUTS III regions for Portuguese sequences from the present study and Province information for Spanish sequences, as reported in the literature [4,5] or in <https://nextstrain.clinbioinfospa.es/wnv> (accessed as of 2026-02-13).

The full phylogenetic trees can be explored interactively at <https://auspice.us/> using the JSON files provided as Supplementary Dataset (first drag&drop both JSON files, and then the metadata TSV file to enhance exploration of the subtree). The phylogenetic sub-branch depicted in Figure 1 can be delineated by the C4302G mutation (relative to the reference NC\_009942.1 used for mutation annotation), which is exclusive to this branch in the global tree.

## References

1. Hadfield J, Megill C, Bell SM, Huddleston J, Potter B, Callender C, et al. Nextstrain: real-time tracking of pathogen evolution. *Bioinformatics*. 2018;34:4121-3.
2. Borges V, Pinheiro M, Pechirra P, Guiomar R, Gomes JP. INSaFLU: an automated open web-based bioinformatics suite "from-reads" for influenza whole-genome-sequencing-based surveillance. *Genome Med*. 2018;10:46.
3. Santos JD, Sobral D, Pinheiro M, Isidro J, Bogaardt C, Pinto M, et al. INSaFLU-TELEVIR: an open web-based bioinformatics suite for viral metagenomic detection and routine genomic surveillance. *Genome Med*. 2024;16:61.
4. Maroco D, Parreira R, Dos Santos FA, et al. Tracking the Pathways of West Nile Virus: Phylogenetic and Phylogeographic Analysis of a 2024 Isolate from Portugal. *Microorganisms*. 2025;13(3):585. doi: 10.3390/microorganisms13030585.
5. Aguilera-Sepúlveda P, Cano-Gómez C, Villalba R, et al. The key role of Spain in the traffic of West Nile virus lineage 1 strains between Europe and Africa. *Inf Dis*. 2024;56(9),743–758. doi: 10.1080/23744235.2024.2348633.
